# Supplementary material for: Comparison of standard and HD FT-IR with multimodal CARS/TPEF/SHG/FLIMS imaging in the detection of the early stage of pulmonary metastasis of murine breast cancer
Source: Royal Society of Chemistry journal article supplement (doi:10.1039/d0an00762e), 2020-01-01

## ELECTRONIC SUPPORTING INFORMATION

### Comparison of standard and HD FT-IR with multimodal CARS/TPEF/SHG/FLIMS imaging in the detection of the early stage of pulmonary metastasis of murine breast cancer

Karolina Chrabaszcz,<sup>a,b,c</sup> Tobias Meyer,<sup>d,e</sup> Hyeonsoo Bae,<sup>e</sup> Michael Schmitt,<sup>e</sup> Agnieszka Jaształ,<sup>b</sup> Marta Smeda,<sup>b</sup> , Marta Stojak,<sup>b</sup> Jürgen Popp,<sup>d,e</sup>  
Kamilla Malek,<sup>a,b</sup> Katarzyna M. Marzec,<sup>b,c†</sup>

<sup>a</sup> Faculty of Chemistry, Jagiellonian University, 2 Gronostajowa St., 30-387 Krakow, Poland

<sup>b</sup> Jagiellonian Centre for Experimental Therapeutics, Jagiellonian University, 14 Bobrzynskiego ST., 30-384 Krakow, Poland

<sup>c</sup> Centre for Medical Genomics OMICRON, Jagiellonian University Medical College, Kopernika 7c, 31-034 Krakow, Poland

<sup>d</sup> Leibniz-Institute of Photonic Technology e.V., Albert-Einstein-Str. 9, 07745 Jena, Germany

<sup>e</sup> Institute of Physical Chemistry and Abbe Center of Photonics, Friedrich-Schiller-University, Albert-Einstein-Str. 6, 07745 Jena, Germany

<sup>†</sup>Corresponding Author: Katarzyna M. Marzec (e-mail: [katarzyna.marzec@jcet.eu](mailto:katarzyna.marzec@jcet.eu))

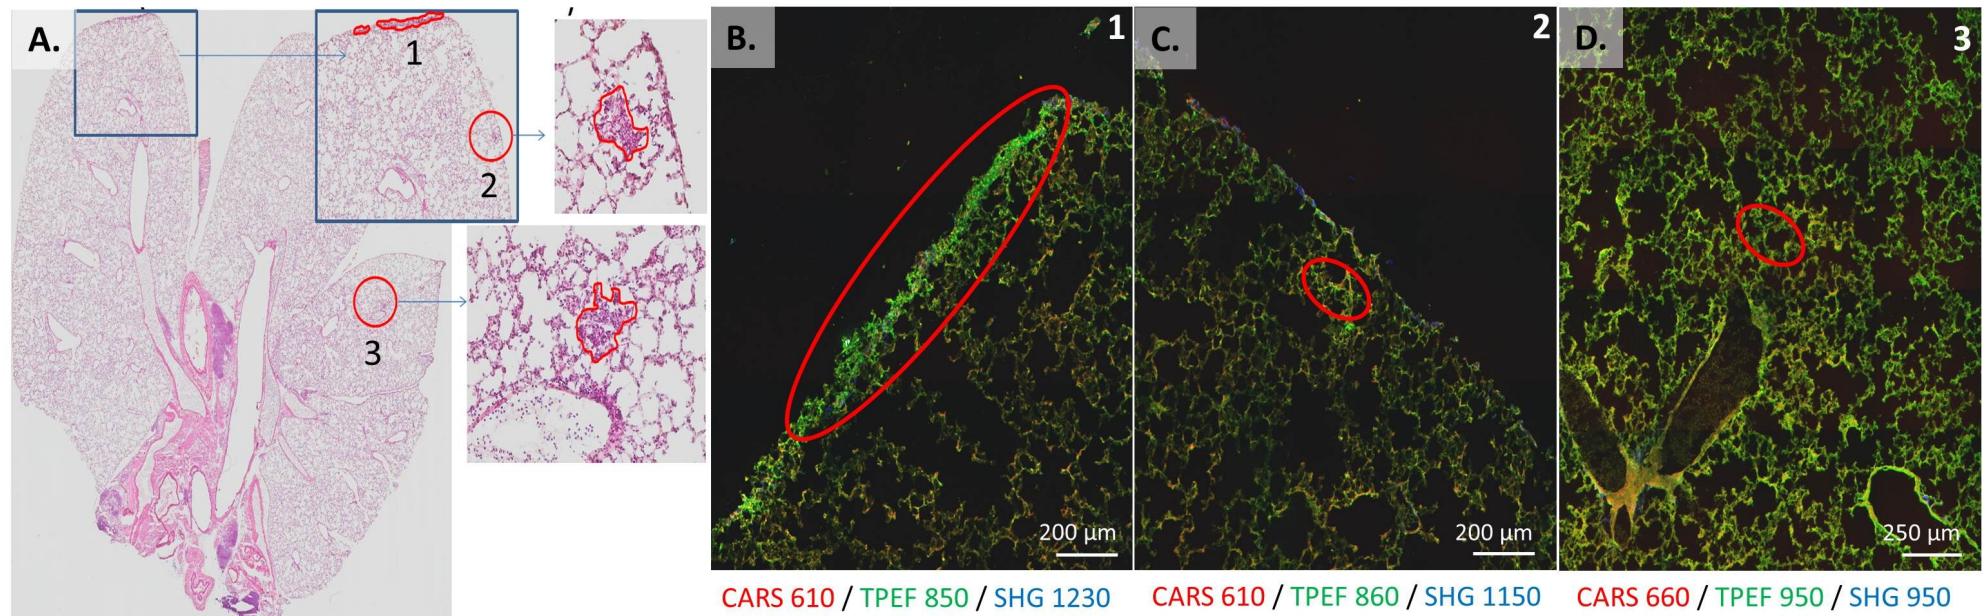

**Figure S1.** Comparison of H&E staining images of the tissue cross-sections (**A**) with marked micrometastasis area (**1-3**); (**B-D**) false-colour molecular map combined from CARS, TPEF and SHG images for the adjacent lung cross-section with selected areas (red) corresponding to the localization of cancer cells cluster from **A**.

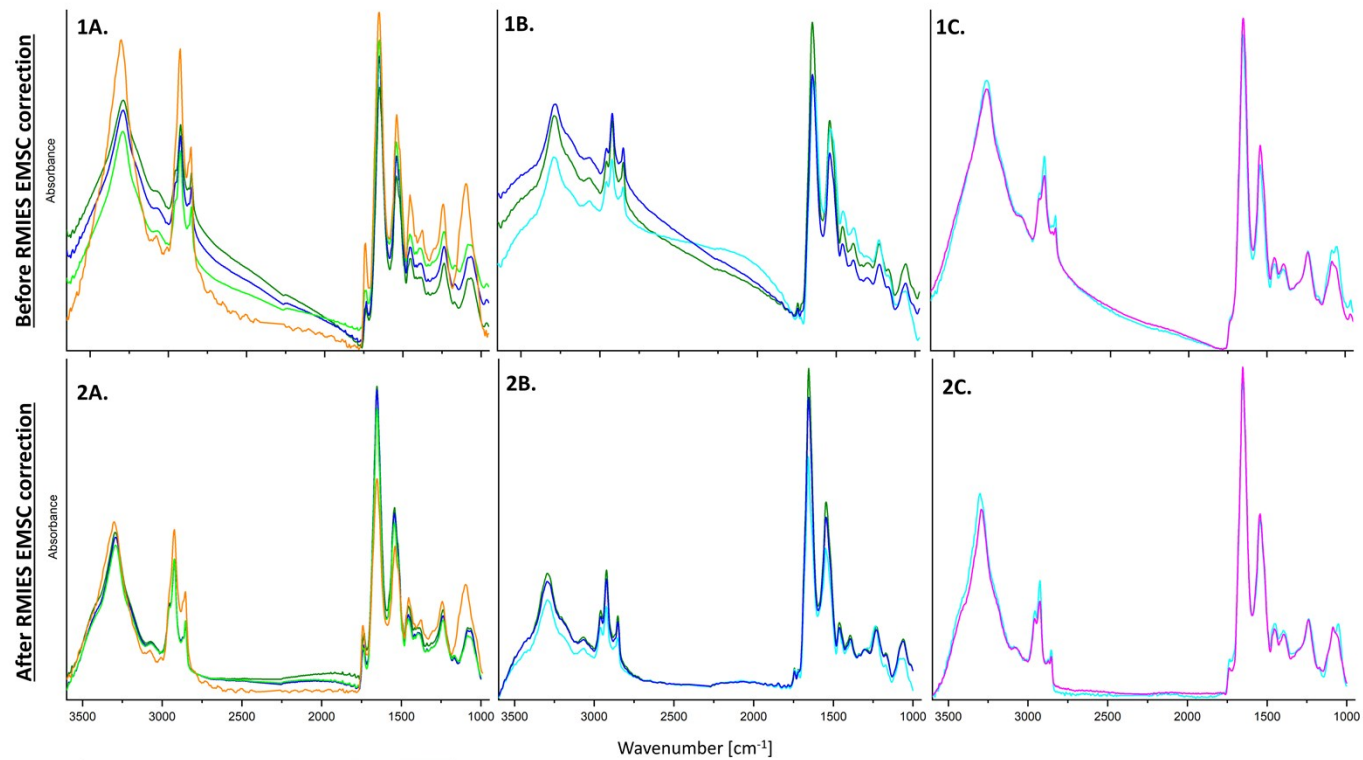

**Figure S2.** Mean normal FT-IR spectra extracted from the UHCA cluster maps (3A-C.) before (1A-C) and after (2A-C) without RMieS EMSC correction. Orange spectrum contains bands characteristic for OCT (c.a. 1730,1247,1100 $\text{cm}^{-1}$ ), therefore is not display in Fig.1. The colors of spectra correspond to the colors of the classes.

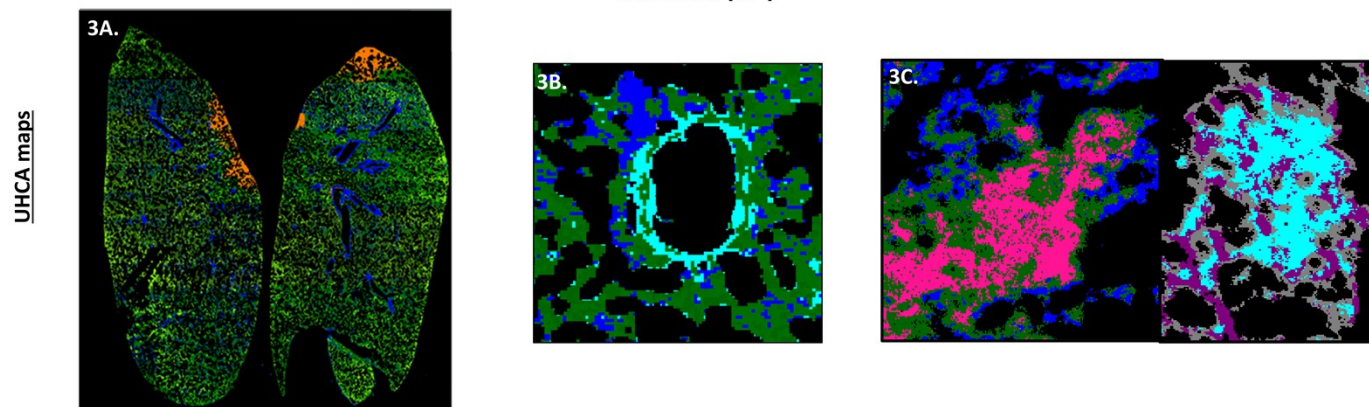

Supplement: d0an00762e4.pdf [file d0an00762e4.pdf]
