# Supplementary figures and images for: Comparison of standard and HD FT-IR with multimodal CARS/TPEF/SHG/FLIMS imaging in the detection of the early stage of pulmonary metastasis of murine breast cancer
Source: Royal Society of Chemistry journal article supplement (doi:10.1039/d0an00762e), 2020-01-01

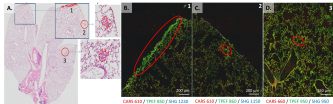

Supplement: d0an00762e1.pdf [file d0an00762e1.pdf]

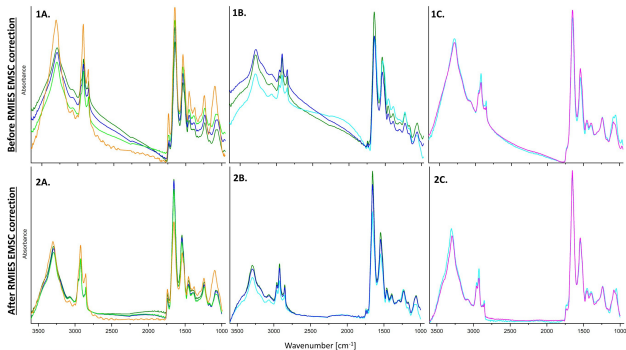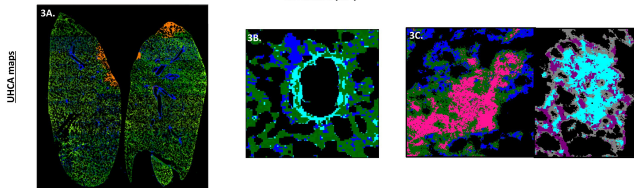

Supplement: d0an00762e2.pdf [file d0an00762e2.pdf]
